# Supplementary material
Source: Springer Nature journal article supplement (https://www.springermedizin.de/resource/supplementary/12885_2004_237_MOESM1_ESM.pdf/9469346)
Supplement: MOESM1 [file 9469346]

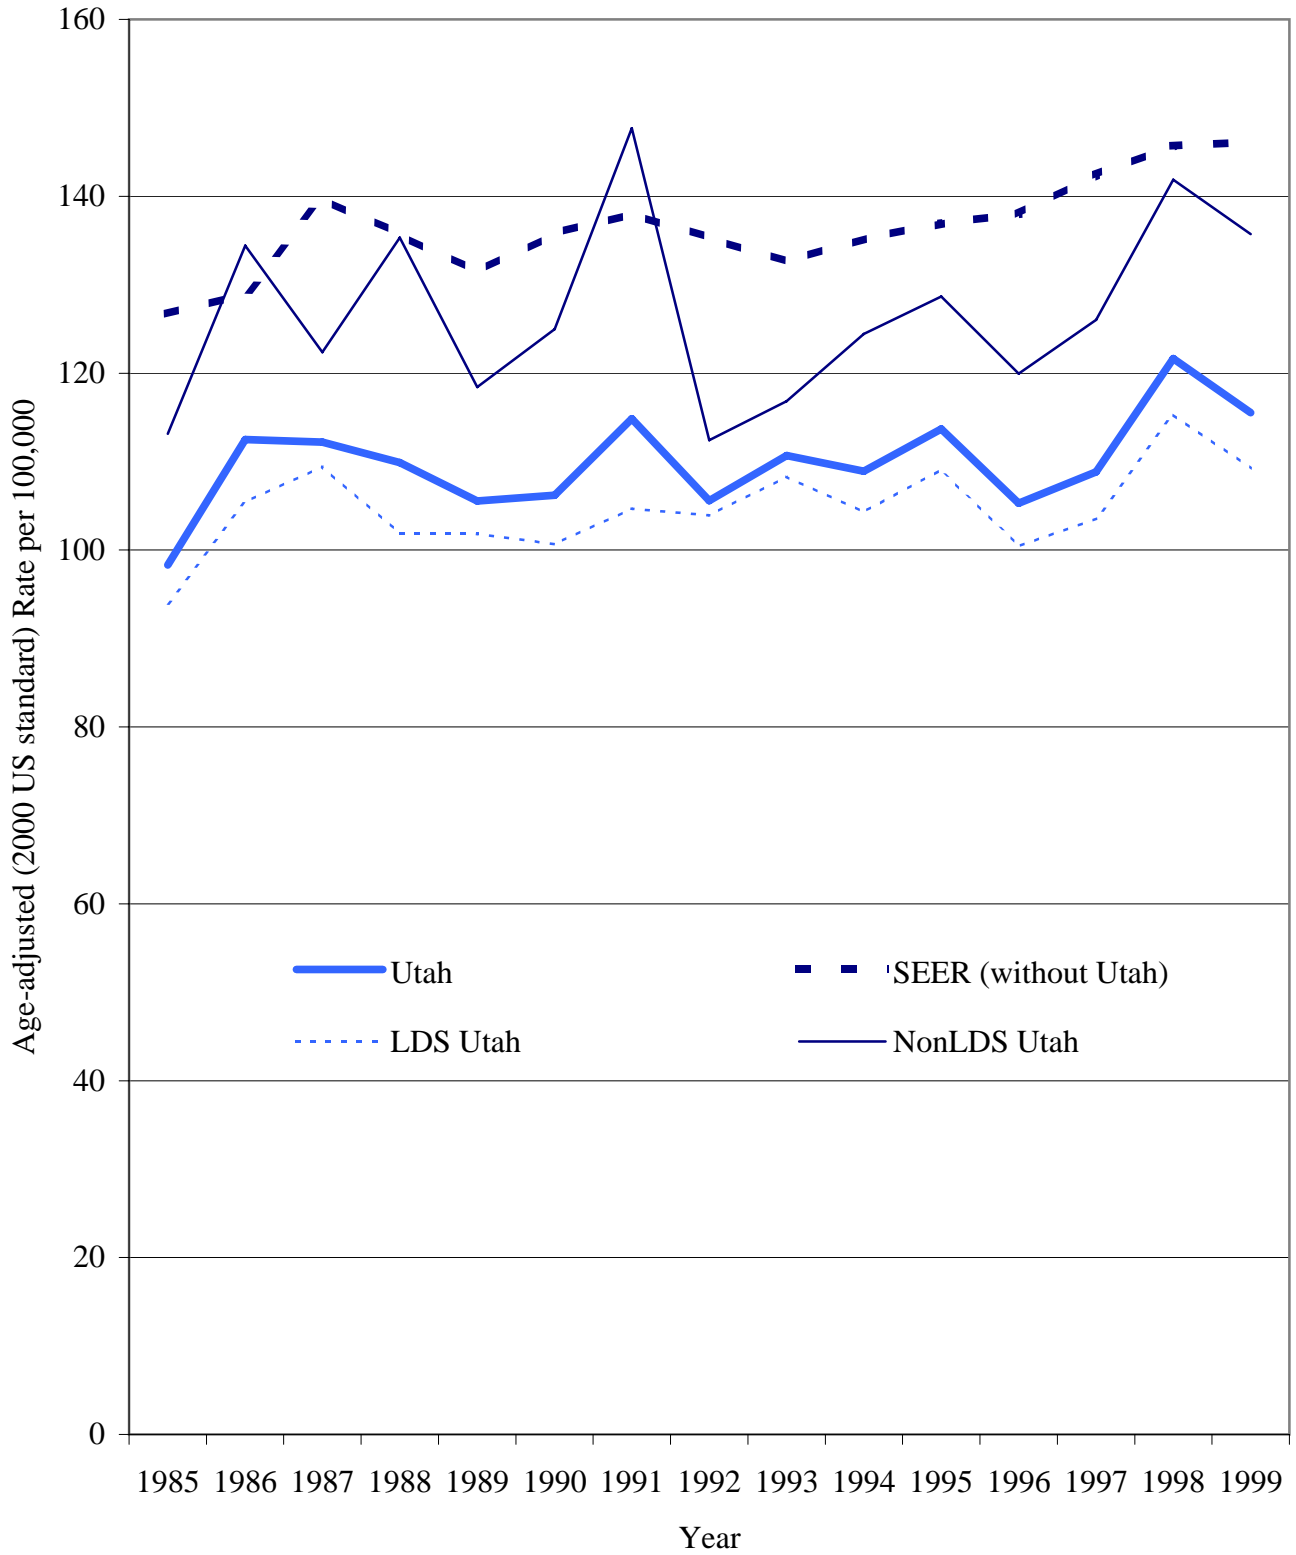

SEER: Surveillance, Epidemiology, and End Results.

SEER areas: San Francisco-Oakland, Connecticut, Metropolitan Detroit, Hawaii, Iowa, New Mexico, Seattle (Puget Sound), Utah, and Metropolitan Atlanta.
